# Supplementary material for: Cadmium and molybdenum co-induce pyroptosis and apoptosis via the PTEN/PI3K/AKT axis in the livers of Shaoxing ducks (Anas platyrhynchos)
Source: Royal Society of Chemistry journal article supplement (doi:10.1039/d1fo02855c), 2022-01-01
Supplement: d1fo02855c1.pdf [file d1fo02855c1.pdf]

**Table S1 The diet composition of control group and intervention groups**

| basal diet                                                                           | Control  |              | Mo group |              | Cd group |              | Mo+Cd group |              |
|--------------------------------------------------------------------------------------|----------|--------------|----------|--------------|----------|--------------|-------------|--------------|
|                                                                                      | 0~3 week | After 3 week | 0~3 week | After 3 week | 0~3 week | After 3 week | 0~3 week    | After 3 week |
| <b>Composition (%)</b>                                                               |          |              |          |              |          |              |             |              |
| Soybean meal                                                                         | 18.00    | 20.00        | 18.00    | 20.00        | 18.00    | 20.00        | 18.00       | 20.00        |
| Corn                                                                                 | 59.99    | 44.00        | 59.99    | 44.00        | 59.99    | 44.00        | 59.99       | 44.00        |
| Wheat bran                                                                           | 11.00    | 14.40        | 11.00    | 14.40        | 11.00    | 14.40        | 11.00       | 14.40        |
| Rice bran                                                                            | —        | 11.00        | —        | 11.00        | —        | 11.00        | —           | 11.00        |
| Cottonseed meal                                                                      | 5.00     | —            | 5.00     | —            | 5.00     | —            | 5.00        | —            |
| Bone meal                                                                            | 1.58     | 5.80         | 1.58     | 5.80         | 1.58     | 5.80         | 1.58        | 5.80         |
| Fish meal                                                                            | 3.00     | 2.00         | 3.00     | 2.00         | 3.00     | 2.00         | 3.00        | 2.00         |
| Salt                                                                                 | 0.370    | 0.300        | 0.370    | 0.300        | 0.370    | 0.300        | 0.370       | 0.300        |
| Met                                                                                  | 0.060    | 0.100        | 0.060    | 0.100        | 0.060    | 0.100        | 0.060       | 0.100        |
| CaHPO <sub>4</sub>                                                                   | —        | 1.40         | —        | 1.40         | —        | 1.40         | —           | 1.40         |
| Premix*                                                                              | 1.00     | 1.00         | 1.00     | 1.00         | 1.00     | 1.00         | 1.00        | 1.00         |
| Total                                                                                | 100      | 100          | 100      | 100          | 100      | 100          | 100         | 100          |
| <b>Nutrient level</b>                                                                |          |              |          |              |          |              |             |              |
| Ca (%)                                                                               | 0.800    | 2.77         | 0.800    | 2.77         | 0.800    | 2.77         | 0.800       | 2.77         |
| ME (MJ·kg <sup>-1</sup> )                                                            | 11.93    | 11.44        | 11.93    | 11.44        | 11.93    | 11.44        | 11.93       | 11.44        |
| Crude protein (%)                                                                    | 18.03    | 17.63        | 18.03    | 17.63        | 18.03    | 17.63        | 18.03       | 17.63        |
| Met + Cys (%)                                                                        | 0.600    | 0.650        | 0.600    | 0.650        | 0.600    | 0.650        | 0.600       | 0.650        |
| Total phosphorous (%)                                                                | 0.670    | 0.700        | 0.670    | 0.700        | 0.670    | 0.700        | 0.670       | 0.700        |
| Lys (%)                                                                              | 0.850    | 0.970        | 0.850    | 0.970        | 0.850    | 0.970        | 0.850       | 0.970        |
| Available phosphorus (%)                                                             | 0.350    | 0.400        | 0.350    | 0.400        | 0.350    | 0.400        | 0.350       | 0.400        |
| <b>Mo or/and Cd (mg/kg)</b>                                                          |          |              |          |              |          |              |             |              |
| [(NH <sub>4</sub> ) <sub>6</sub> Mo <sub>7</sub> O <sub>24</sub> ·4H <sub>2</sub> O] | 0.00     | 0.00         | 100.00   | 100.00       | 0.00     | 0.00         | 100.00      | 100.00       |
| (3CdSO <sub>4</sub> ·8H <sub>2</sub> O)                                              | 0.00     | 0.00         | 0.00     | 0.00         | 4.00     | 4.00         | 4.00        | 4.00         |

\*Per kilogram of premix contained the followings: V<sub>D3</sub> 400 IU, V<sub>A</sub> 2,500 IU, V<sub>B</sub> 1,215.0 µg, V<sub>K3</sub> 0.5 mg, V<sub>E</sub> 10.0 mg, Riboflavin 4.0 mg, Thiamine 4.0 mg, Nicotinic acid 55.0 mg, Pantothenic acid 11.0 mg, Biotin 0.08 mg, Pyridoxine 2.5 mg, Folic acid 1.0 mg, Choline 1,300.0 mg, Se 0.20 mg, Fe 80.0 mg, Cu 10.0 mg, Zn 60.0 mg, Mn 50.0 mg.

**Table S2 Gene primers sequence and their GenBank accession number**

| Gene name      | Accession number | Primer sequences (5' to 3')                                         |
|----------------|------------------|---------------------------------------------------------------------|
| Caspase-1      | XM_027446016.1   | Forward: TCGGTGCTGGTGTCTGACTCA<br>Reverse: AGACGGTATCAGGTGTGGAGGA   |
| NLRP3          | XM_005029958.4   | Forward: CCAGCCTGAAGATCGGAGACCT<br>Reverse: AGGAGCCACCCTAGAGGAGAGT  |
| ASC            | XM_013201308.1   | Forward: CAGCATTCTGGATCGGCTCT<br>Reverse: ATTTTCTCCTGCCTGATGCTT     |
| NEK7           | XM_027462475.1   | Forward: CCTTAGTTGGTACACCTTATTA<br>Reverse: TCCGGGTTGATGCACATATTA   |
| GSDMA          | XM_027445236.1   | Forward: GATGGATTCGTGAGCGTGGACA<br>Reverse: TGTTGCGTCTTCCGTAGTTGCT  |
| GSDME          | XM_021273107.2   | Forward: GTGTGAACTCCTGCTCCGTGA<br>Reverse: CCTAAGAGCTGCAAGAAGTCAACC |
| IL-1 $\beta$   | DQ393268.1       | Forward: TGGGCATCAAGGGCTACA<br>Reverse: TCGGGTTGGTTGGTGATG          |
| IL-18          | XM_027444356.1   | Forward: CTGATGACGATGAGCTGGAA<br>Reverse: CAAAAGCTGCCATGTTTCAGA     |
| Caspase-3      | XM_027456288.1   | Forward: AGGAATGAATCTACCTGCT<br>Reverse: TCTACATCCGTACCCGAAC        |
| Bax            | KY788660.1       | Forward: AAACCAAGCGGCTCAGCGAGT<br>Reverse: GGCCCCAGTTGAAGGCTCCGTCC  |
| Bak-1          | XM_005026830.4   | Forward: CACCAAGGAGAATGCCTACGAT<br>Reverse: TCACCCGGCCCCAGTTAATGC   |
| Cyt C          | XM_027447873.1   | Forward: CTGAAAGATGCCACTGCGAA<br>Reverse: AGCACCCCACATATGAGCAAC     |
| Bcl-2          | XM_027451677.1   | Forward: AGTACCTGAACCGGCACCT<br>Reverse: TGCAAGCTCCCACCAGAACCA      |
| $\beta$ -actin | EF667345.1       | Forward: ATGTCGCCCTGGATTTTCG<br>Reverse: CACAGGACTCCATACCCAAGAAT    |
